# Supplementary material
Source: publisher figshare collection journal article supplement (https://frontiersin.figshare.com/ndownloader/files/28240398)
Supplement: Supplementary file 1 [file 28240398]

**Geographical differentiation YEAR 2008**

1. **All 5 countries (1-AT (Austria), 2-RO (Romania), 3-SI (Slovenia), 4-ME (Montenegro), 5-AR (Argentina))**

**84.1% initial classification, 79.5% cross-validation**


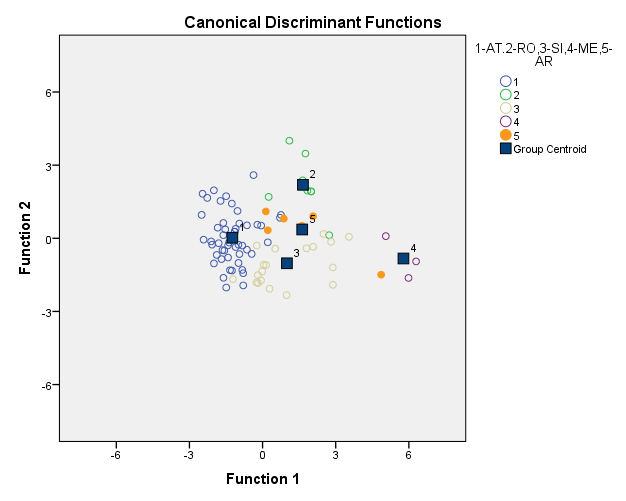


| **Classification Resultsa,c** | | | | | | | | |
| --- | --- | --- | --- | --- | --- | --- | --- | --- |
|  |  | 1-AT.2-RO,3-SI,4-ME,5-AR | Predicted Group Membership | | | | | Total |
|  |  | 1 | 2 | 3 | 4 | 5 |
| Original | Count | 1 | 46 | 1 | 1 | 0 | 2 | 50 |
| 2 | 0 | 8 | 0 | 0 | 1 | 9 |
| 3 | 2 | 0 | 12 | 0 | 6 | 20 |
| 4 | 0 | 0 | 0 | 3 | 0 | 3 |
| 5 | 0 | 0 | 0 | 1 | 5 | 6 |
| % | 1 | 92.0 | 2.0 | 2.0 | .0 | 4.0 | 100.0 |
| 2 | .0 | 88.9 | .0 | .0 | 11.1 | 100.0 |
| 3 | 10.0 | .0 | 60.0 | .0 | 30.0 | 100.0 |
| 4 | .0 | .0 | .0 | 100.0 | .0 | 100.0 |
| 5 | .0 | .0 | .0 | 16.7 | 83.3 | 100.0 |
| Cross-validatedb | Count | 1 | 45 | 1 | 2 | 0 | 2 | 50 |
| 2 | 0 | 8 | 0 | 0 | 1 | 9 |
| 3 | 2 | 0 | 11 | 0 | 7 | 20 |
| 4 | 0 | 0 | 0 | 3 | 0 | 3 |
| 5 | 2 | 0 | 0 | 1 | 3 | 6 |
| % | 1 | 90.0 | 2.0 | 4.0 | .0 | 4.0 | 100.0 |
| 2 | .0 | 88.9 | .0 | .0 | 11.1 | 100.0 |
| 3 | 10.0 | .0 | 55.0 | .0 | 35.0 | 100.0 |
| 4 | .0 | .0 | .0 | 100.0 | .0 | 100.0 |
| 5 | 33.3 | .0 | .0 | 16.7 | 50.0 | 100.0 |
| a. 84.1% of original grouped cases correctly classified. | | | | | | | | |
| b. Cross validation is done only for those cases in the analysis. In cross validation, each case is classified by the functions derived from all cases other than that case  c. 79.5% of cross-validated grouped cases correctly classified. | | | | | | | | |
| 1. **4 Countries (without AR)**   **89% initial classification, 87.8% cross-validation**  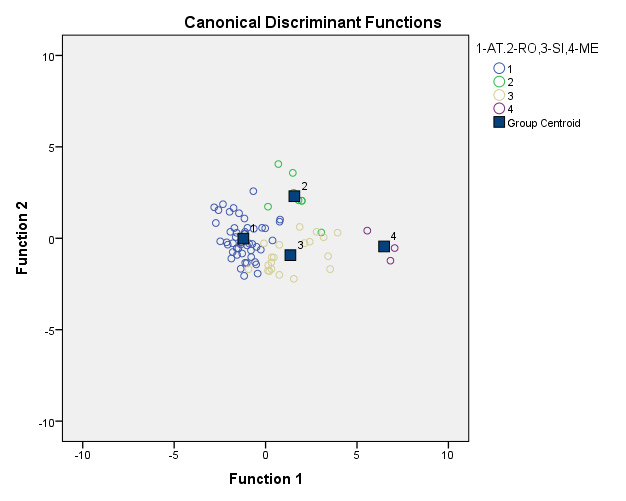   | **Classification Resultsa,c** | | | | | | | | | --- | --- | --- | --- | --- | --- | --- | --- | |  |  | 1-AT.2-RO,3-SI,4-ME | Predicted Group Membership | | | | Total | |  |  | 1 | 2 | 3 | 4 | | Original | Count | 1 | 45 | 3 | 2 | 0 | 50 | | 2 | 0 | 8 | 1 | 0 | 9 | | 3 | 2 | 0 | 17 | 1 | 20 | | 4 | 0 | 0 | 0 | 3 | 3 | | % | 1 | 90.0 | 6.0 | 4.0 | .0 | 100.0 | | 2 | .0 | 88.9 | 11.1 | .0 | 100.0 | | 3 | 10.0 | .0 | 85.0 | 5.0 | 100.0 | | 4 | .0 | .0 | .0 | 100.0 | 100.0 | | Cross-validatedb | Count | 1 | 45 | 3 | 2 | 0 | 50 | | 2 | 0 | 8 | 1 | 0 | 9 | | 3 | 2 | 1 | 16 | 1 | 20 | | 4 | 0 | 0 | 0 | 3 | 3 | | % | 1 | 90.0 | 6.0 | 4.0 | .0 | 100.0 | | 2 | .0 | 88.9 | 11.1 | .0 | 100.0 | | 3 | 10.0 | 5.0 | 80.0 | 5.0 | 100.0 | | 4 | .0 | .0 | .0 | 100.0 | 100.0 | | a. 89.0% of original grouped cases correctly classified. | | | | | | | | | b. Cross validation is done only for those cases in the analysis. In cross validation, each case is classified by the functions derived from all cases other than that case. | | | | | | | | | c. 87.8% of cross-validated grouped cases correctly classified.   1. **3 Countries (without AR and ME)**   **89.9% initial classification, 88.6% cross-validation**  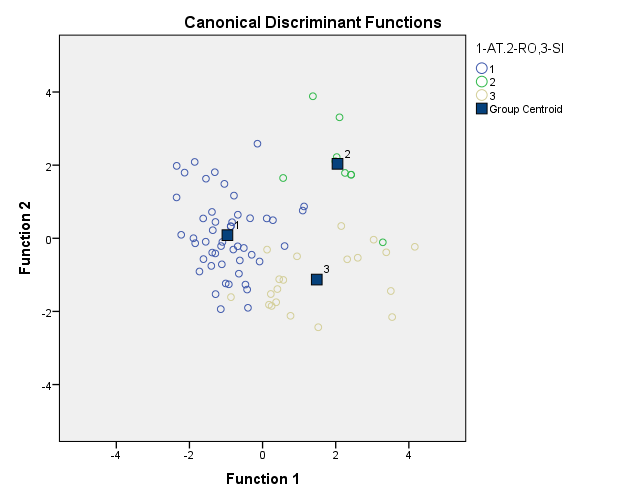   | **Classification Resultsa,c** | | | | | | | | --- | --- | --- | --- | --- | --- | --- | |  |  | 1-AT.2-RO,3-SI | Predicted Group Membership | | | Total | |  |  | 1 | 2 | 3 | | Original | Count | 1 | 45 | 3 | 2 | 50 | | 2 | 0 | 8 | 1 | 9 | | 3 | 2 | 0 | 18 | 20 | | % | 1 | 90.0 | 6.0 | 4.0 | 100.0 | | 2 | .0 | 88.9 | 11.1 | 100.0 | | 3 | 10.0 | .0 | 90.0 | 100.0 | | Cross-validatedb | Count | 1 | 45 | 3 | 2 | 50 | | 2 | 0 | 8 | 1 | 9 | | 3 | 2 | 1 | 17 | 20 | | % | 1 | 90.0 | 6.0 | 4.0 | 100.0 | | 2 | .0 | 88.9 | 11.1 | 100.0 | | 3 | 10.0 | 5.0 | 85.0 | 100.0 | | a. 89.9% of original grouped cases correctly classified. | | | | | | | | b. Cross validation is done only for those cases in the analysis. In cross validation, each case is classified by the functions derived from all cases other than that case. | | | | | | | | c. 88.6% of cross-validated grouped cases correctly classified. | | | | | | | | | | | | | | | | | | | | | | | |

**Geographical differentiation Year 2009**

1. **All 5 countries (1-AT, 2-RO, 3-SI, 4-ME, 5-AR)**

**56.4 % initial classification, 54.3% cross-validation**


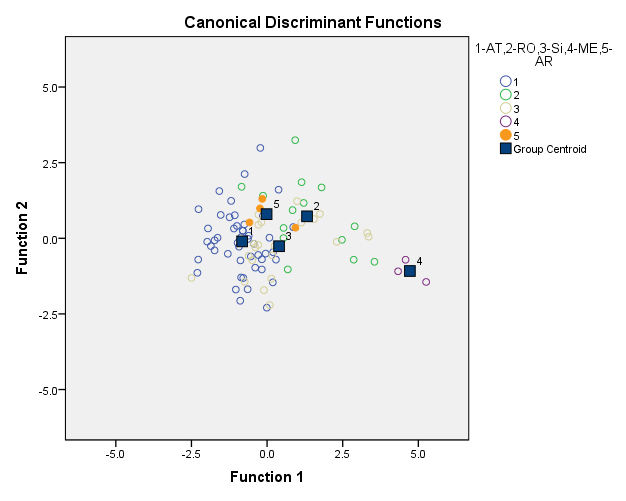


| **Classification Resultsa,c** | | | | | | | | |
| --- | --- | --- | --- | --- | --- | --- | --- | --- |
|  |  | 1-AT,2-RO,3-Si,4-ME,5-AR | Predicted Group Membership | | | | | Total |
|  |  | 1 | 2 | 3 | 4 | 5 |
| Original | Count | 1 | 34 | 1 | 8 | 0 | 7 | 50 |
| 2 | 0 | 7 | 3 | 2 | 2 | 14 |
| 3 | 7 | 5 | 5 | 2 | 3 | 22 |
| 4 | 0 | 0 | 0 | 3 | 0 | 3 |
| 5 | 0 | 1 | 0 | 0 | 4 | 5 |
| % | 1 | 68.0 | 2.0 | 16.0 | .0 | 14.0 | 100.0 |
| 2 | .0 | 50.0 | 21.4 | 14.3 | 14.3 | 100.0 |
| 3 | 31.8 | 22.7 | 22.7 | 9.1 | 13.6 | 100.0 |
| 4 | .0 | .0 | .0 | 100.0 | .0 | 100.0 |
| 5 | .0 | 20.0 | .0 | .0 | 80.0 | 100.0 |
| Cross-validatedb | Count | 1 | 34 | 1 | 8 | 0 | 7 | 50 |
| 2 | 0 | 6 | 3 | 2 | 3 | 14 |
| 3 | 7 | 5 | 5 | 2 | 3 | 22 |
| 4 | 0 | 0 | 0 | 3 | 0 | 3 |
| 5 | 1 | 1 | 0 | 0 | 3 | 5 |
| % | 1 | 68.0 | 2.0 | 16.0 | .0 | 14.0 | 100.0 |
| 2 | .0 | 42.9 | 21.4 | 14.3 | 21.4 | 100.0 |
| 3 | 31.8 | 22.7 | 22.7 | 9.1 | 13.6 | 100.0 |
| 4 | .0 | .0 | .0 | 100.0 | .0 | 100.0 |
| 5 | 20.0 | 20.0 | .0 | .0 | 60.0 | 100.0 |
| a. 56.4% of original grouped cases correctly classified. | | | | | | | | |
| b. Cross validation is done only for those cases in the analysis. In cross validation, each case is classified by the functions derived from all cases other than that case. | | | | | | | | |
| c. 54.3% of cross-validated grouped cases correctly classified. | | | | | | | | |

1. **4 Countries (without AR)**

**60.7% initial classification, 59.6% cross-validation**


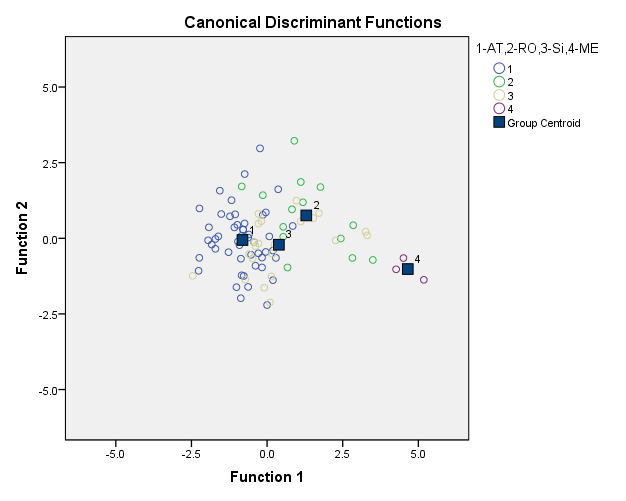


| **Classification Resultsa,c** | | | | | | | |
| --- | --- | --- | --- | --- | --- | --- | --- |
|  |  | 1-AT,2-RO,3-Si,4-ME | Predicted Group Membership | | | | Total |
|  |  | 1 | 2 | 3 | 4 |
| Original | Count | 1 | 38 | 3 | 9 | 0 | 50 |
| 2 | 1 | 8 | 3 | 2 | 14 |
| 3 | 10 | 5 | 5 | 2 | 22 |
| 4 | 0 | 0 | 0 | 3 | 3 |
| % | 1 | 76.0 | 6.0 | 18.0 | .0 | 100.0 |
| 2 | 7.1 | 57.1 | 21.4 | 14.3 | 100.0 |
| 3 | 45.5 | 22.7 | 22.7 | 9.1 | 100.0 |
| 4 | .0 | .0 | .0 | 100.0 | 100.0 |
| Cross-validatedb | Count | 1 | 38 | 3 | 9 | 0 | 50 |
| 2 | 2 | 7 | 3 | 2 | 14 |
| 3 | 10 | 5 | 5 | 2 | 22 |
| 4 | 0 | 0 | 0 | 3 | 3 |
| % | 1 | 76.0 | 6.0 | 18.0 | .0 | 100.0 |
| 2 | 14.3 | 50.0 | 21.4 | 14.3 | 100.0 |
| 3 | 45.5 | 22.7 | 22.7 | 9.1 | 100.0 |
| 4 | .0 | .0 | .0 | 100.0 | 100.0 |
| a. 60.7% of original grouped cases correctly classified. | | | | | | | |
| b. Cross validation is done only for those cases in the analysis. In cross validation, each case is classified by the functions derived from all cases other than that case. | | | | | | | |
| c. 59.6% of cross-validated grouped cases correctly classified. | | | | | | | |

1. **3 Countries (without AR and ME)**

**62.8% initial classification, 62.8% cross-validation**

| **Classification Resultsa,c** | | | | | | |
| --- | --- | --- | --- | --- | --- | --- |
|  |  | 1-AT,2-RO,3-Si,4-ME | Predicted Group Membership | | | Total |
|  |  | 1 | 2 | 3 |
| Original | Count | 1 | 40 | 2 | 8 | 50 |
| 2 | 0 | 9 | 5 | 14 |
| 3 | 10 | 7 | 5 | 22 |
| % | 1 | 80.0 | 4.0 | 16.0 | 100.0 |
| 2 | .0 | 64.3 | 35.7 | 100.0 |
| 3 | 45.5 | 31.8 | 22.7 | 100.0 |
| Cross-validatedb | Count | 1 | 40 | 2 | 8 | 50 |
| 2 | 0 | 9 | 5 | 14 |
| 3 | 10 | 7 | 5 | 22 |
| % | 1 | 80.0 | 4.0 | 16.0 | 100.0 |
| 2 | .0 | 64.3 | 35.7 | 100.0 |
| 3 | 45.5 | 31.8 | 22.7 | 100.0 |
| a. 62.8% of original grouped cases correctly classified. | | | | | | |
| b. Cross validation is done only for those cases in the analysis. In cross validation, each case is classified by the functions derived from all cases other than that case. | | | | | | |
| c. 62.8% of cross-validated grouped cases correctly classified. | | | | | | |

**Geographical differentiation - years 2008+2009**

1. **All 5 countries (1-AT, 2-RO, 3-SI, 4-ME, 5-AR)**

**67.0 % initial classification, 65.4% cross-validation**


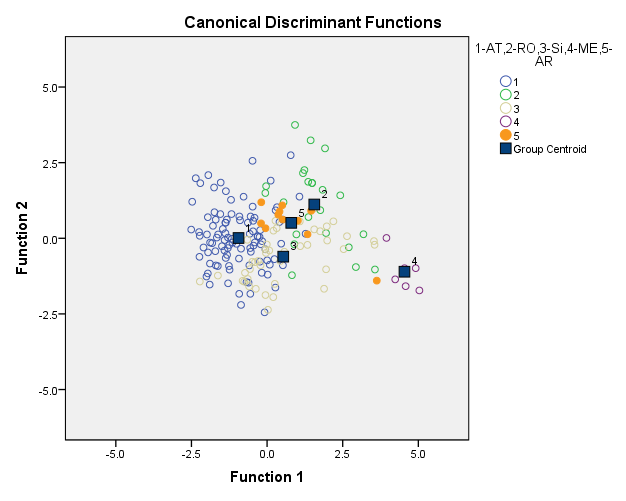


| **Classification Resultsa,c** | | | | | | | | |
| --- | --- | --- | --- | --- | --- | --- | --- | --- |
|  |  | 1-AT,2-RO,3-Si,4-ME,5-AR | Predicted Group Membership | | | | | Total |
|  |  | 1.00 | 2.00 | 3.00 | 4.00 | 5.00 |
| Original | Count | 1.00 | 75 | 2 | 16 | 0 | 7 | 100 |
| 2.00 | 0 | 14 | 2 | 3 | 4 | 23 |
| 3.00 | 9 | 7 | 19 | 2 | 5 | 42 |
| 4.00 | 0 | 0 | 0 | 6 | 0 | 6 |
| 5.00 | 1 | 1 | 0 | 1 | 8 | 11 |
| % | 1.00 | 75.0 | 2.0 | 16.0 | .0 | 7.0 | 100.0 |
| 2.00 | .0 | 60.9 | 8.7 | 13.0 | 17.4 | 100.0 |
| 3.00 | 21.4 | 16.7 | 45.2 | 4.8 | 11.9 | 100.0 |
| 4.00 | .0 | .0 | .0 | 100.0 | .0 | 100.0 |
| 5.00 | 9.1 | 9.1 | .0 | 9.1 | 72.7 | 100.0 |
| Cross-validatedb | Count | 1.00 | 75 | 2 | 16 | 0 | 7 | 100 |
| 2.00 | 0 | 14 | 2 | 3 | 4 | 23 |
| 3.00 | 10 | 7 | 17 | 2 | 6 | 42 |
| 4.00 | 0 | 0 | 0 | 6 | 0 | 6 |
| 5.00 | 2 | 1 | 0 | 1 | 7 | 11 |
| % | 1.00 | 75.0 | 2.0 | 16.0 | .0 | 7.0 | 100.0 |
| 2.00 | .0 | 60.9 | 8.7 | 13.0 | 17.4 | 100.0 |
| 3.00 | 23.8 | 16.7 | 40.5 | 4.8 | 14.3 | 100.0 |
| 4.00 | .0 | .0 | .0 | 100.0 | .0 | 100.0 |
| 5.00 | 18.2 | 9.1 | .0 | 9.1 | 63.6 | 100.0 |
| a. 67.0% of original grouped cases correctly classified. | | | | | | | | |
| b. Cross validation is done only for those cases in the analysis. In cross validation, each case is classified by the functions derived from all cases other than that case. | | | | | | | | |
| c. 65.4% of cross-validated grouped cases correctly classified. | | | | | | | | |

**Vintage differentiation 2008 vs 2009**

1. **All samples**

**63.7 % initial classification, 63.2% cross-validation**

| **Classification Resultsa,c** | | | | | |
| --- | --- | --- | --- | --- | --- |
|  |  | 1-2008,2-2009 | Predicted Group Membership | | Total |
|  |  | 1.00 | 2.00 |
| Original | Count | 1.00 | 54 | 40 | 94 |
| 2.00 | 26 | 62 | 88 |
| % | 1.00 | 57.4 | 42.6 | 100.0 |
| 2.00 | 29.5 | 70.5 | 100.0 |
| Cross-validatedb | Count | 1.00 | 53 | 41 | 94 |
| 2.00 | 26 | 62 | 88 |
| % | 1.00 | 56.4 | 43.6 | 100.0 |
| 2.00 | 29.5 | 70.5 | 100.0 |
| a. 63.7% of original grouped cases correctly classified. | | | | | |
| b. Cross validation is done only for those cases in the analysis. In cross validation, each case is classified by the functions derived from all cases other than that case. | | | | | |
| c. 63.2% of cross-validated grouped cases correctly classified. | | | | | |

1. Austrian samples

**68.5 % initial classification, 68.5% cross-validation**

| **Classification Resultsa,c** | | | | | |
| --- | --- | --- | --- | --- | --- |
|  |  | 1-2008,2-2009 | Predicted Group Membership | | Total |
|  |  | 1.00 | 2.00 |
| Original | Count | 1.00 | 57 | 29 | 86 |
| 2.00 | 23 | 56 | 79 |
| % | 1.00 | 66.3 | 33.7 | 100.0 |
| 2.00 | 29.1 | 70.9 | 100.0 |
| Cross-validatedb | Count | 1.00 | 57 | 29 | 86 |
| 2.00 | 23 | 56 | 79 |
| % | 1.00 | 66.3 | 33.7 | 100.0 |
| 2.00 | 29.1 | 70.9 | 100.0 |
| a. 68.5% of original grouped cases correctly classified. | | | | | |
| b. Cross validation is done only for those cases in the analysis. In cross validation, each case is classified by the functions derived from all cases other than that case. | | | | | |
| c. 68.5% of cross-validated grouped cases correctly classified. | | | | | |

3.Slovenian samples

**80 % initial classification, 79% cross-validation**

| **Classification Resultsa,c** | | | | | |
| --- | --- | --- | --- | --- | --- |
|  |  | 1-2008,2-2009 | Predicted Group Membership | | Total |
|  |  | 1.00 | 2.00 |
| Original | Count | 1.00 | 39 | 11 | 50 |
| 2.00 | 9 | 41 | 50 |
| % | 1.00 | 78.0 | 22.0 | 100.0 |
| 2.00 | 18.0 | 82.0 | 100.0 |
| Cross-validatedb | Count | 1.00 | 39 | 11 | 50 |
| 2.00 | 10 | 40 | 50 |
| % | 1.00 | 78.0 | 22.0 | 100.0 |
| 2.00 | 20.0 | 80.0 | 100.0 |
| a. 80.0% of original grouped cases correctly classified. | | | | | |
| b. Cross validation is done only for those cases in the analysis. In cross validation, each case is classified by the functions derived from all cases other than that case. | | | | | |
| c. 79.0% of cross-validated grouped cases correctly classified. | | | | | |
